# Supplementary material for: High capacity and fast removal of Cr(vi) by alkali lignin-based poly(tetraethylene pentamine-pyrogallol) sorbent
Source: Royal Society of Chemistry journal article supplement (doi:10.1039/d2ra07143f), 2023-01-01
Supplement: d2ra07143f1.pdf [file d2ra07143f1.pdf]

## High capacity and fast removal of Cr(VI) by alkali lignin-based poly(tetraethylene pentamine-pyrogallol) sorbent

Rufei Xing <sup>a</sup>, Yanxin Song <sup>b\*</sup>, Tingting Gao <sup>c</sup>, Xiaoxia Cai <sup>a</sup>, Jinshui Yao <sup>a</sup>, Qinze Liu <sup>a\*</sup>, Changbin Zhang <sup>d</sup>

\* Corresponding author at: School of Materials Science and Engineering, Qilu University of Technology (Shandong Academy of Sciences), #3501 Daxue Road, Western University Science Park, Jinan City 250353, Shandong Province, P. R. China.

Tel: +008613806410075

E-mail: liuqinze@qlu.edu.cn (Prof. Qinze Liu, Ph.D)

\* Corresponding author at: School of Chemical Engineering & Pharmacy of Jining Technician College, #3166 Chongwen Road, Jining City 272100, Shandong Province, P. R. China.

Tel: +008615668106398

E-mail: syxlhy001@163.com (Prof. Yanxin Song, Ph.D)

---

<sup>a</sup> School of Materials Science and Engineering, Qilu University of Technology (Shandong Academy of Sciences), Jinan 250353, P. R. China

<sup>b</sup> School of Chemical Engineering & Pharmacy, Jining Technician College, Jining 272100, P. R. China

<sup>c</sup> School of Chemistry and Chemical Engineering, Qilu University of Technology (Shandong Academy of Sciences), Jinan 250353, P. R. China

<sup>d</sup> Research Center for Eco-Environmental Sciences, Chinese Academy of Science, Beijing 100085, P. R. China

## 1 Characterization

2 Fig. S1 shows the SEM and EDS spectra of AL-PTAP before adsorption of  
3 Cr(VI). It can be seen from Fig. S1 that there is no chromium in AL-PTAP before  
4 adsorption and there is no significant change in the surface morphology of AL-PTAP  
5 before and after adsorption

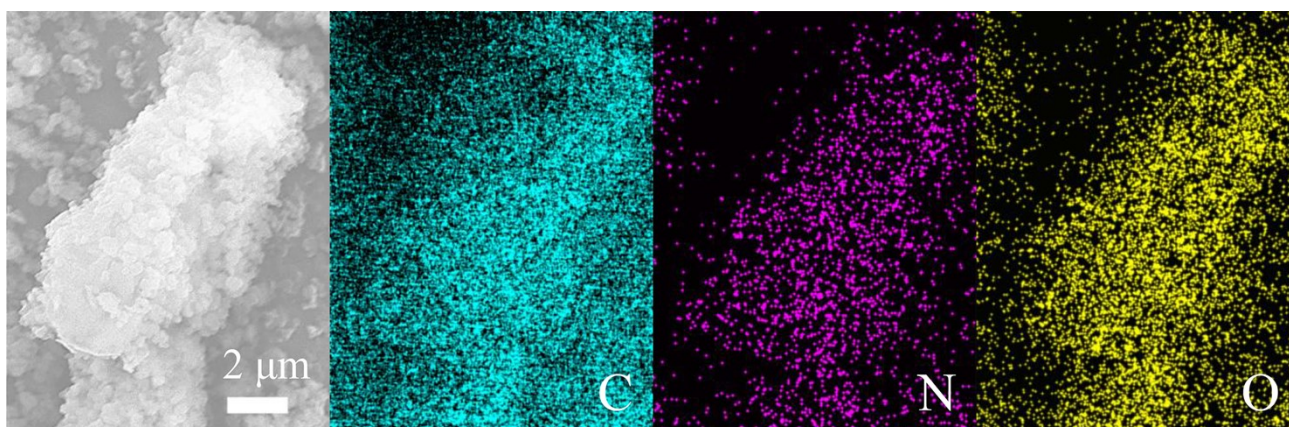

**Fig. S1.** EDS mappings of AL-PTAP before adsorption.

6

### 7 *Adsorption thermodynamic study*

8 Thermodynamic parameters can be used to study the thermodynamic properties of  
9 the adsorption process of Cr(VI) by AL-PTAP and determine whether the adsorption  
10 process is a spontaneous reaction. Thermodynamic parameters such as enthalpy change  
11 ( $\Delta H$ ), entropy change ( $\Delta S$ ) and Gibbs free energy ( $\Delta G$ ) can be calculated from equation  
12 (1). If the calculated  $\Delta G < 0$  and  $\Delta H > 0$ , it proves that the adsorption process is  
13 endothermic and spontaneous.<sup>1</sup> The formula for calculating the thermodynamic  
14 parameters is as follows:

$$15 \quad \Delta G = \Delta H - T\Delta S \quad (1)$$

16

17 **V**an't Hoff equation:

$$18 \quad \ln K_c = -\Delta H/RT + \Delta S/R \quad (2)$$

19

$$20 \quad K_c = C_a/C_e = (C_0 - C_e)/C_e \quad (3)$$

21

22 where  $K_c$  (mg/L) is the standard thermodynamic equilibrium constant.  $T(K)$  is the  
23 ambient temperature.  $R$  (8.314 J mol/K) is the gas constant.  $C_a$  is the amount of Cr(VI)  
24 adsorbed on the adsorbent.  $C_e$  is the amount of residual Cr(VI) in the solution.

25 The values of  $\Delta G$ ,  $\Delta H$  and  $\Delta S$  were calculated from the slope and intercept of the  
26  $\ln K_c$  versus  $1/T$  curve (Fig. S2, Table S1). The calculated  $\Delta G < 0$  indicates that the  
27 adsorption process of Cr(VI) by AL-PTAP is spontaneous. The calculated  $\Delta H > 0$   
28 reflects that the adsorption process is endothermic.

29

30

31

32

33

34

35

36

37

38

39

40

41

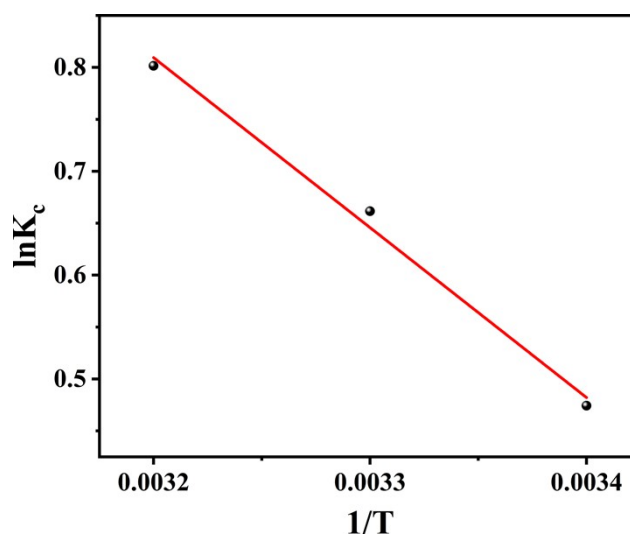

42

43

**Fig. S2.** Thermodynamic model of adsorption of Cr(VI) by AL-PTAP.

44 **Table S2.** Thermodynamic parameters of Cr(VI) removal by AL-PTAP.

| Temperature (K) | Van't Hoff equation         | $\Delta G$<br>(KJ/mol) | $\Delta H$<br>(KJ/mol) | $\Delta S$<br>(J/mol·K) |
|-----------------|-----------------------------|------------------------|------------------------|-------------------------|
| 293.15          | $\ln K_c = 6.0446 - 1636/T$ | -1.13                  |                        |                         |
| 303.15          |                             | -1.63                  | 13.6017                | 50.2548                 |

45

46

47 *BET surface area analysis.*

48

49

50

51

52

53

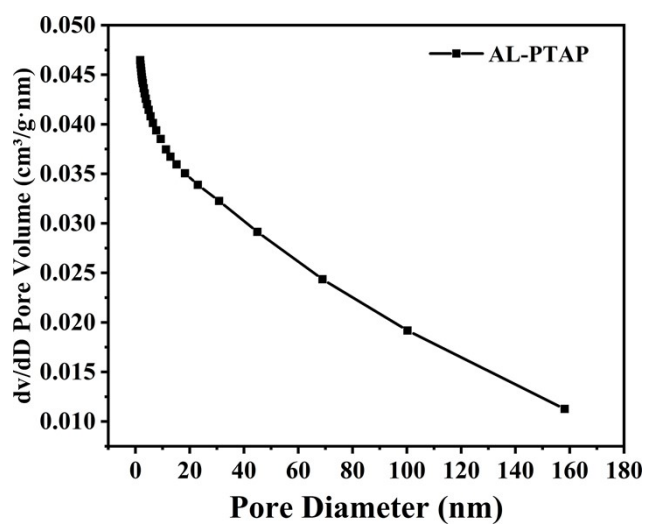

54

**Fig. S3.** Pore size distribution of Al-PTAP.

55

56

57

58

59

60

61

62

63

64

65

66

67

68

69 **References**

70 1. P. Sharma and M. R. Das, *Journal of Chemical & Engineering Data*, 2012, **58**, 151-158.

71
